# Supplementary material
Source: Springer Nature journal article supplement (https://www.springermedizin.de/resource/supplementary/12950_2012_342_MOESM4_ESM.pdf/9557506)

A

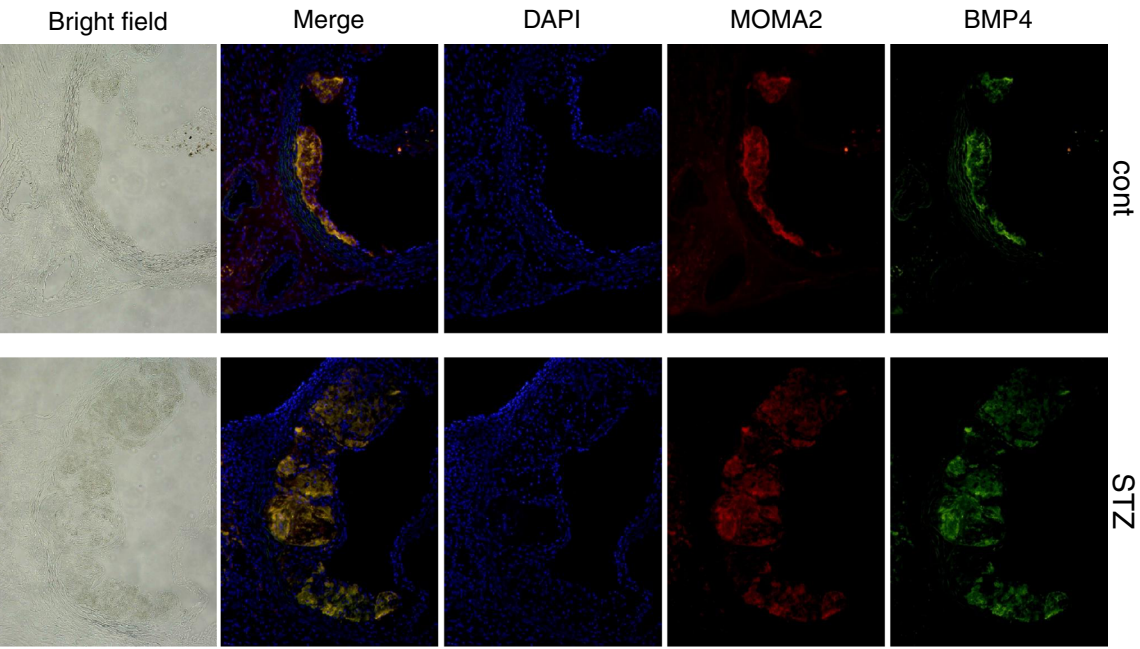

cont

STZ

B

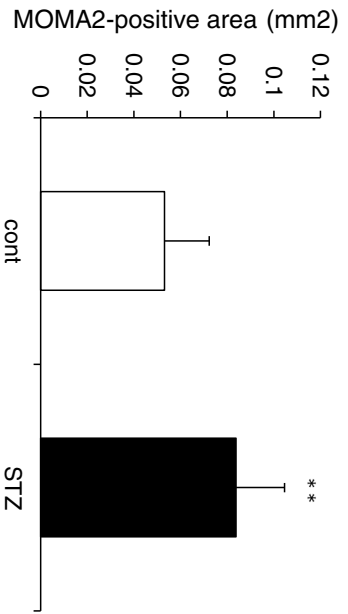

cont

STZ

\*\*

\*\*

100µm

Supplement: MOESM4 [file 9557506]
